# Supplementary material
Source: publisher figshare collection journal article supplement (https://tandf.figshare.com/articles/dataset/_/25106419)
Supplement: Supplementary file 1 [file 1]

## **Supplemental Material**

### **Red Quantum-Dot Common Layer for Organic–Quantum-Dot Hybrid Light-Emitting Diodes for Full-Color Displays**

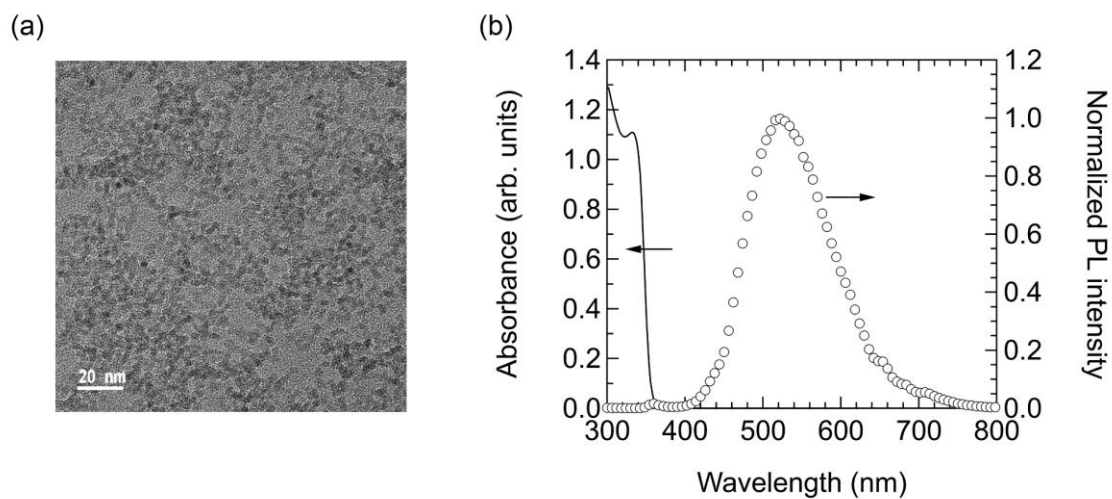

**Figure S1.** (a) TEM image of the ZMO nanoparticles and (b) their absorption and PL spectra dispersed in ethanol.

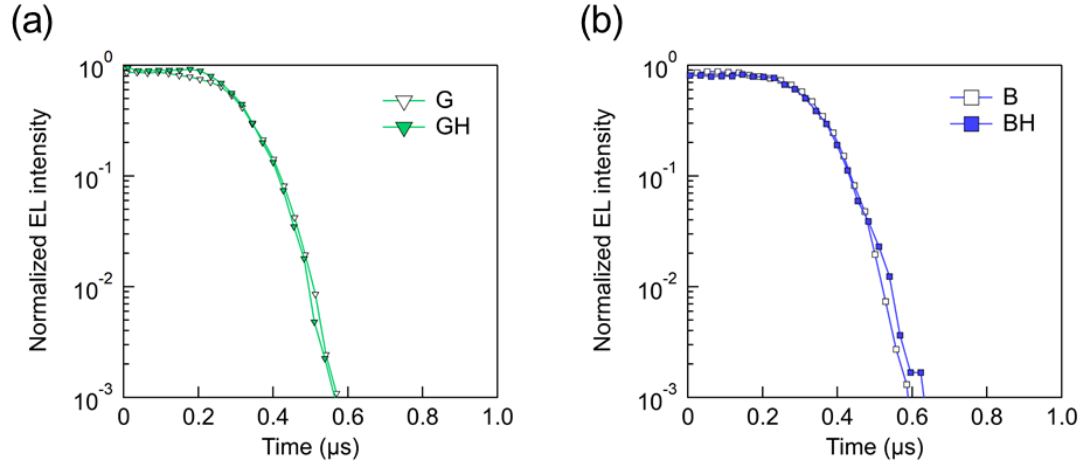

**Figure S2.** Transient EL decay curves of the devices (a) **G** and **GH**, and (b) **B** and **BH**.

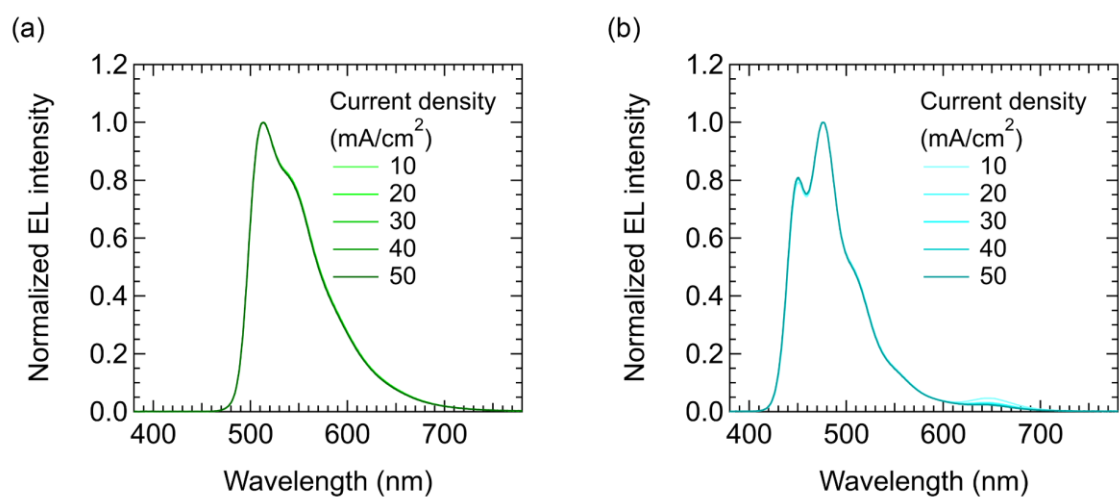

**Figure S3.** Normalized EL spectra of the devices (a) **GH** and (b) **BH** at various current density (10–50 mA/cm<sup>2</sup>).

**Video S1.** Demonstration of a full-color-emitting hybrid device in which the red, green, and blue sub-pixels are placed in parallel on a single substrate. Each pixel was biased with  $J$  of 1 mA/cm<sup>2</sup>.
